# Supplementary material for: A Nested Case-Control Study of Association between Metabolome and Hypertension Risk
Source: Hindawi journal article supplement (doi:10.1155/2016/7646979), 2016-01-01
Supplement: f1 [file 7646979.f1.pdf]

Table S1. Baseline characteristics of participants included and not included in the study

| Characteristics          | Cases       |              |            | Controls    |              |            |
|--------------------------|-------------|--------------|------------|-------------|--------------|------------|
|                          | Included    | Not included | * <i>P</i> | Included    | Not included | * <i>P</i> |
| N                        | 29          | 5            | --         | 29          | 5            | --         |
| Age (years)              | 52.1±4.2    | 51.2±6.3     | 0.65       | 51.9±4.1    | 52.4±4.0     | 0.81       |
| Men (%)                  | 44.8        | 20.0         | 0.38       | 41.4        | 40.0         | 1.00       |
| BMI (kg/m <sup>2</sup> ) | 23.2±2.6    | 22.0±2.4     | 0.33       | 24.0±2.8    | 25.2±1.9     | 0.33       |
| SBP (mmHg)               | 110.8±6.6   | 113.6±4.72   | 0.37       | 110.2±6.4   | 115.8±3.6    | 0.07       |
| DBP (mmHg)               | 72.9±4.1    | 72.8±4.8     | 0.96       | 72.4±4.8    | 74.2±2.6     | 0.42       |
| FBG (mg/dl)              | 83.9±12.7   | 80.4±9.4     | 0.56       | 82.4±7.9    | 77.6±9.2     | 0.23       |
| TG(mg/dl)                | 84(65, 106) | 91(89, 168)  | 0.26       | 96(64, 111) | 187(90, 284) | 0.20       |
| TC(mg/dl)                | 202.9±35.1  | 194.4±47.5   | 0.64       | 199.9±30.0  | 208.2±60.7   | 0.78       |
| LDL-C(mg/dl)             | 121.1±30.3  | 122.0±40.5   | 0.95       | 116.5±23.1  | 107.0±45.8   | 0.67       |
| HDL-C(mg/dl)             | 56.6±10.7   | 56.0±8.5     | 0.90       | 60.7±15.9   | 56.2±18.8    | 0.58       |
| Smoke (%)                | 20.7        | 0            | 0.56       | 10.3        | 40.0         | 0.15       |
| Drink (%)                | 13.8        | 0            | 1.00       | 6.9         | 0            | 1.00       |

Abbreviations: BMI, body mass index; SBP, systolic blood pressure; DBP, diastolic blood pressure; FBG, fasting blood glucose; TG, triglycerides; TC, total cholesterol; LDL-C, low-density lipoprotein cholesterol; HDL-C, high-density lipoprotein cholesterol. Data are expressed as a percent for categorical variables, as mean±standard deviation for continuous variables in cases of normally distributed data, and as medians (interquartile ranges) otherwise.\* *P* values were calculated between participants included and not included in the study.

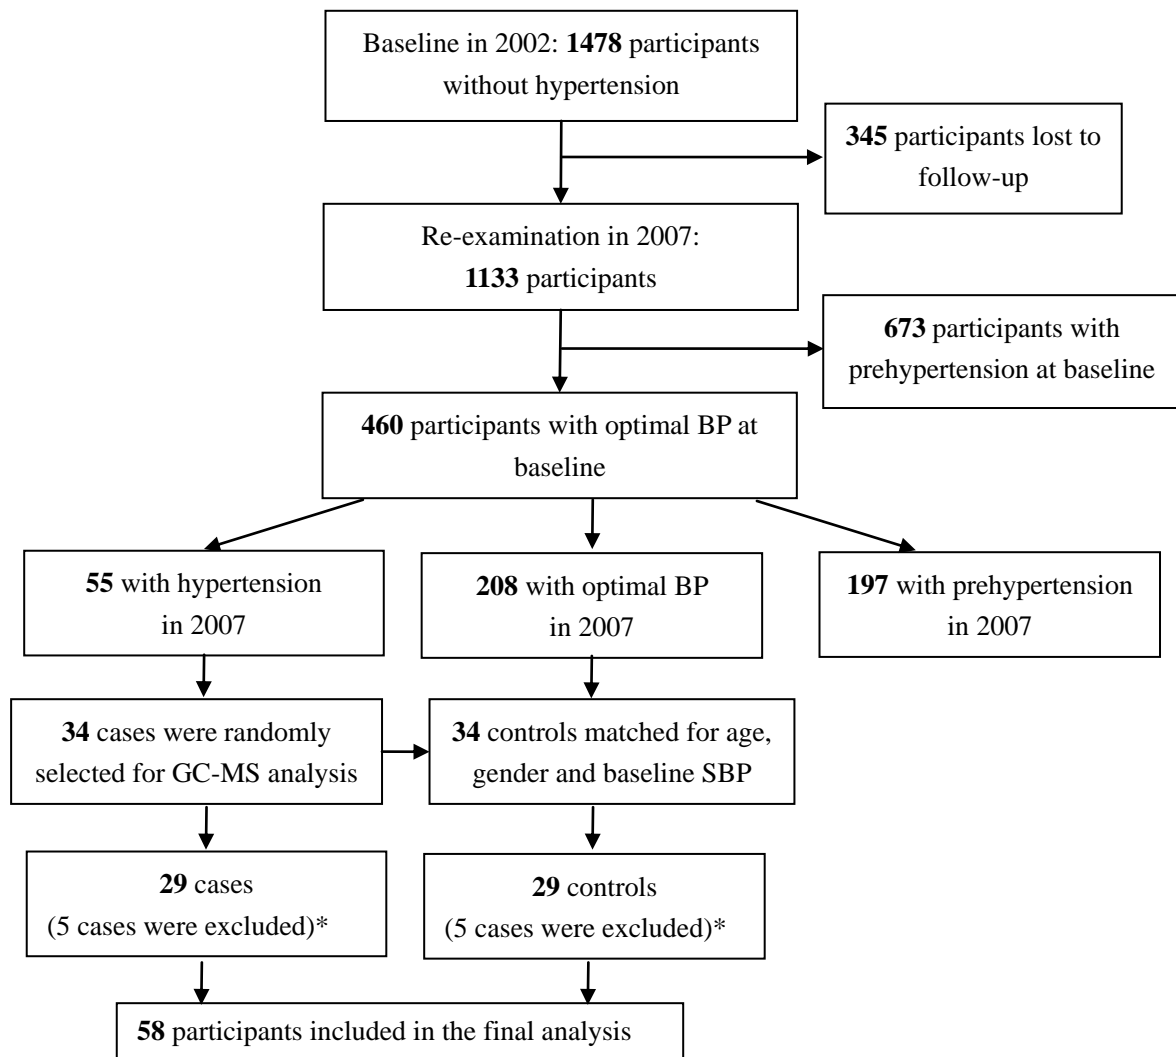

Figure S1 Flow chart of participant selection

\* Participants with more than 80% of metabolites below the detection limit or missing
